1 **Stability of amino acids and related amines in human serum under different**  
2 **preprocessing and pre-storage conditions based on iTRAQ<sup>®</sup>-LC-MS/MS**

3 Zhuoling An\*, Chen Shi, Pengfei Li, Lihong Liu\*

4

5 *Pharmacy Department of Beijing Chao-Yang Hospital, Capital Medical University, Beijing,*

6 *100020, PR China*

7 **\* Corresponding author**

8 Zhuoling An

9 No. 8 Gongren Tiyuchang Nanlu, Chaoyang District, Beijing, 100020, P. R. China

10 Tel: (+86) 01085231362.

11 Fax: (+86) 01085231362.

12 E-mail:anzhuoling@163.com

13

14 Lihong Liu, Professor of Medicine

15 No. 8 Gongren Tiyuchang Nanlu, Chaoyang District, Beijing, 100020, P. R. China

16 Tel: (+86) 01085231788.

17 Fax: (+86) 01085231788.

18 E-mail: liulihong@bjcyh.com

19

20 **Abstract**

21 Amino acids analysis or metabonomics requires abundant serum/plasma samples collection and  
22 samples storage has become inevitable given the limited capacity for immediate analysis.  
23 Currently, most of the existing studies on metabolites stability during sample storage focused on  
24 long-term and short-term stability, while many functional amino acids might be ignored due to the  
25 poor sensitivity and detection of analysis methods. Here, we attempted to elucidate the stability of  
26 amino acids and related amines as comprehensive as possible in human serum following different

27 preprocessing and pre-storage procedures. Pooled, fasting serum samples were collected and  
28 stored at 4 °C and 22 °C respectively after a delay in sample processing (0, 1, 2, 4, 8, 12 and 24  
29 hours) and underwent freeze-thaw cycles for three times at –80 °C. The concentration of amino  
30 acids and related amines were quantified using isobaric tagging reagent iTRAQ®-LC-MS/MS.  
31 Approximately 54.84 %, 58.06 % and 48.39 % of detectable and target analytes altered at 4 °C  
32 and 22 °C during pre-treatment and freeze-thaw cycles. Some amino acids which are not stable  
33 and relatively stable were found. Our study provided detailed profiles and suggestions for amino  
34 acids in human serum corresponding to diverse collection and pre-treatment measures.

### 35 **Keywords**

36 Amino acid and related amines; stability; serum; LC-MS/MS; iTRAQ

### 37 **Introduction**

38 High-quality biological samples are required for reliable outcomes of research, as well as valid  
39 data sets, which are crucial for successful biomarker identification. The detection and  
40 quantification of free amino acids have been routinely applied in clinical laboratories for the  
41 diagnosis of inborn errors of metabolism [1]. The amino acid synthesis defects are presented by  
42 many clinical symptoms including central nervous system and mental disability for children, skin  
43 disorders such as cutis laxa in defects of proline synthesis, collodion-like skin and ichthyosis in  
44 serine deficiency, and necrolytic erythema in glutamine deficiency [2]. Increasing literatures have  
45 implicated the role of free amino acids in a number of diseases such as cardiovascular diseases [3-  
46 5], insulin resistance and type 2 diabetes [6,7], renal diseases [8], hepatic disorders [9] and cancer  
47 [10,11].

48 Increased interests in amino acids related to diseases have prompted the need for verifying the  
49 stability and sensitivity under different sample processing conditions. The existing studies almost  
50 all focused on long-term and short-term stability during sample storage. Indeed, storage of plasma  
51 samples at –80 °C for up to five years could lead to a change in concentrations of amino acids,  
52 acylcarnitines, glycerophospholipids, sphingomyelins and hexoses [12]. Augmented levels of

53 amino acids during storage were observed in other long-term stability studies [13, 14]. The human  
54 plasma metabolome was adequately stable to long-term storage at  $-80\text{ }^{\circ}\text{C}$  for up to seven years  
55 but the opposite result was found upon longer storage, where cysteine and cystine decreased over  
56 the analyzed storage period [15]. Evidence showed serum amino acids were modified in  
57 composition during 29 years long-term storage at  $-25\text{ }^{\circ}\text{C}$  as methionine was transformed to  
58 methionine sulfoxide [16]. The stability of 18 free amino acids in the urine samples was found to  
59 be sustained for 72 hours at  $4\text{ }^{\circ}\text{C}$ , after one freeze thaw cycle but no more than four weeks at  
60  $-80\text{ }^{\circ}\text{C}$  [17]. The opposite results were found where amino acids were altered by delayed freezing  
61 [18]. The concentration of arginine, glycine, ornithine, phenylalanine, serine and isoleucine  
62 increased significantly during pre-storage handling at room temperature while glutamine  
63 decreased slightly at room temperature or on wet ice for 36 hours [19]. Stability in blood and  
64 plasma were also different due to the fact that platelets became activated and their metabolism was  
65 affected by low temperature [20].

66 Amino acids were markedly affected by preanalytical short-term storage in blood at room  
67 temperature for 2 hours and on wet ice for 6 hours, while it was prolonged to 16 hours in plasma  
68 at room temperature. The change in concentration of glutamate in plasma other than blood was  
69 observed presumably, while taurine changed only in blood through the same procedure [20]. Some  
70 amino acids and biogenic amines could become unstable within 3 hours on cool packs. Isoleucine,  
71 tryptophan and valine evidently decreased when undergone two freeze-thaw cycles [21]. The nine  
72 amino acids were stable up to 24 hours in plasma at  $37\text{ }^{\circ}\text{C}$  among which couple of amino acids  
73 changed statistically when the plasma specimens were placed at  $4\text{ }^{\circ}\text{C}$  for 24 hours [22]. The amino  
74 acids exhibited significant time-of-day variations [23]. Alanine and other metabolites changed  
75 after four or five freeze-thaw cycles at room temperature [24, 25].

76 Stability of amino acids and related amines in human serum varies under different preprocessing  
77 and pre-storage conditions, which is very important to our medical researchers because of the  
78 large number of serum/plasma samples collection for amino acids analysis in labs, which make it

79 inevitable to optimize their storage as a result of the limited capacity for immediate analysis.  
80 However, a great deal of amino acids might be ignored and not detected due to the limitations of  
81 the scope and approach. The stability of amino acid metabolites have not been systematically  
82 studied in the past. Due to the lack of comprehensive research on amino acids, there is no  
83 comparison of multiple amino acids in the same dimension in one study, which leads to  
84 inconsistent or contradictory conclusions on the stability of some amino acids involved in  
85 different studies. Over the years, the cation-exchange and reversed phase liquid chromatography  
86 coupled to UV optical detection of pre-column or post-column derivatized have been processed on  
87 amino acids analysis. However, the co-eluting substances cannot be distinguished and quantified  
88 by these conventional approaches due to the lack of analyte specificity and selectivity. In the latest  
89 study, we have developed a novel approach by using stable isotope iTRAQ labeling and liquid  
90 chromatography tandem mass spectrometry to achieve comprehensive profiling and quantification  
91 of 42 amino acids and related amines. Compared with typical MS-based methods, the iTRAQ®-  
92 LC-MS/MS showed strong benefits in the availability of internal standards for all the analytes [26].  
93 Our studies aimed to provide proof in estimating the stability of amino acids and related amines in  
94 serum samples after exposure adverse storage temperature and freeze-thawing cycles by using  
95 iTRAQ®-LC-MS/MS where the delineation of amino acid stability was submitted based on a  
96 comprehensive profiling and quantification approach of amino acids.

## 97 **Material and methods**

### 98 **Chemicals and reagents**

99 The derivatization of 44 amino acids and related amines were conducted on the iTRAQ® Reagent  
100 Kit 200 Assay (P/N: A1116, AB Sciex, USA), including phosphoserine (PSer),  
101 phosphoethanolamine (PEtN), taurine (Tau), asparagine (Asn), serine (Ser), hydroxyproline (Hyp),  
102 glycine (Gly), glutamine (Gln), aspartate (Asp), ethanolamine (EtN), histidine (His), threonine  
103 (Thr), citrulline (Cit), sarcosine (Sar),  $\beta$ -alanine ( $\beta$ -Ala), alanine (Ala), glutamate (Glu), 1-  
104 methylhistidine, (1MHis), 3-methylhistidine (3MHis), argininosuccinic acid (Asa), carnosine

105 (Car), homocitrulline (Hcit), arginine (Arg),  $\alpha$ -amino adipic acid (Aad),  $\gamma$ -aminobutyric acid  
106 (GABA),  $\beta$ -aminoisobutyric acid ( $\beta$ -Aib),  $\alpha$ -amino-N-butyric acid ( $\alpha$ -Abu), anserine (Ans),  $\delta$ -  
107 hydroxylysine ( $\delta$ -Hyl), proline (Pro), ornithine (Orn), cystathionine (Cth), cystine (Cys), lysine  
108 (Lys), methionine (Met), valine (Val), norvaline (Nva), tyrosine (Tyr), homocysteine (Hcy),  
109 isoleucine (Ile), leucine (Leu), norleucine (Nle), phenylalanine (Phe), tryptophan (Trp).  
110 Heptafluorobutyric acid ( $\geq 99.5\%$ ) was obtained from sigma Aldrich Corp (Switzerland) for  
111 mobile phase preparation. Acetonitrile and formic acid were purchased from Merck (Darmstadt,  
112 Germany). All chemicals and reagents were of appropriate analytical grades.

### 113 **Serum sample preparation under different storage conditions**

114 The blood samples were collected from 11 different healthy volunteers (6 male, 5 female, age  
115 from 18 to 40 years) with overnight fasting status in Beijing Chao-Yang Hospital in September  
116 2014. All participants were provided written informed consent. The study was carried out under  
117 the approval by the Ethics Committee of Beijing Chao-Yang Hospital affiliated with Beijing  
118 Capital Medical University and all experiments were performed in accordance with relevant  
119 guidelines and regulations. The whole blood sample collection was completed by professional  
120 medical staff. The patient information was verified and the collection time was recorded. About 4  
121 ml of venous whole blood was collected from the cubital fossa vein of the upper limb of  
122 participants. The collected blood samples were placed in non anticoagulant tubes and allowed to  
123 coagulate at 4 °C for 10 minutes, then the samples underwent centrifugation at 3500 rpm at 4 °C  
124 for 10 minutes. The serum supernatant was separated and mixed in a new centrifugation tube by  
125 inverting, split into 200  $\mu$ L aliquots, and then subjected to three handling protocols: (1) the serum  
126 specimens were placed at 4 °C for 0, 1, 2, 4, 8, 12 and 24 hours; (2) samples were stored at 22 °C  
127 for 0, 1, 2, 4, 8, 12 and 24 hours; (3) serum aliquots were stored at -80 °C and subjected to up to  
128 three freeze-thaw cycles. A freeze-thaw cycle consisted of taking out from -80 °C, thawing  
129 aliquots for one hour at 4 °C, and setting them back to -80 °C for 12 hours. Experimental design  
130 for stability of amino acids and related amines in human serum under different storage conditions

131 were showed in Fig.1. Serum specimens were immediately frozen in liquid nitrogen to stop  
132 reaction and preserved respectively.

### 133 **Targeted metabolite quantification**

134 Each sample was measured according to the procedures reported in our previous method [26].  
135 Quadruplicate samples were processed and tested parallel at same temperatures and conditions for  
136 equal duration. A workflow indicating the procedures for biological sample preparation and amino  
137 acid derivatization using ITRAQ reagents was shown in Fig.2. An aliquot of 40  $\mu\text{L}$  of serum  
138 samples was supplemented with 10  $\mu\text{L}$  of 10% sulfosalicylic acid containing 4 nmol of norleucine.  
139 The norleucine was applied as IS for the evaluation of extraction efficiency. The mixture  
140 underwent vortex for 30 s and centrifuged at 10,000  $g$  for 2 min at 4  $^{\circ}\text{C}$ . 10  $\mu\text{L}$  supernatant was  
141 added with 40  $\mu\text{L}$  labeling buffer (containing 20  $\mu\text{mol/L}$  norvaline for evaluation of derivatization  
142 efficiency). Subsequently, 10  $\mu\text{L}$  of the diluted supernatant after vortex for 30 s was mixed with 5  
143  $\mu\text{L}$  iTRAQ<sup>®</sup> reagent 121 solution (one tube mixed with 70  $\mu\text{L}$  isopropanol). The termination of  
144 derivatization reaction was implemented by adding 5  $\mu\text{L}$  of 1.2 % hydroxylamine solution to the  
145 mixture after incubating at room temperature for 30 min. The resulting mixture was evaporated to  
146 dryness under a nitrogen stream. Finally, we re-dissolved the dried residue with 32  $\mu\text{L}$  iTRAQ<sup>®</sup>  
147 reagent 113-labeled standard mix [26].

### 148 **Instrumental analysis**

149 The analysis of amino acid derivatives was performed on a Shimadzu LC-20AT liquid  
150 chromatography system couple with an API 3200 Qtrap<sup>™</sup> mass spectrometer. Chromatography  
151 was performed on a XBridge Shield RP18 column (5  $\mu\text{m}$ , 150 mm $\times$ 4.6 mm) where the column  
152 temperature was held constant at 50  $^{\circ}\text{C}$  with the injection volume of 3  $\mu\text{L}$ . Mobile phase A was  
153 water and phase B was acetonitrile, both containing 0.01% heptafluorobutyric acid and 0.1%  
154 formic acid at a flow of 0.8 mL/min. The separation was conducted under the following gradient:  
155 0–11 min, 0–20 % B; 11–11.5 min, 20–100 % B; 11.5–14 min, 100 % B; 14–14.1 min, 100–0 %  
156 B; 14.1–21 min, 0 % B. Multiple reaction monitoring (MRM) in positive ionization mode was

157 used for amino acid derivatives detection. Parameters including ESI voltage, entrance potential  
158 (EP), and declustering potential (DP) was set up to +5.5 kV, 30 V and 10 V respectively. Besides,  
159 540 °C source temperature, 20 psi curtain gas flow was, 50 psi nebulizer gas flow was, 60 psi  
160 source gas flow and 30 eV collision energy (CE) were displaced in this study. Data acquisition  
161 was carried out by Analyst 1.5.1 software on a DELL computer.

## 162 **Data processing and statistical analysis**

163 Peak integration of iTRAQ-121 and iTRAQ-113 labeled amino acids were carried out by the  
164 Analyst 1.5.1 software (Applied Biosystems Sciex). The iTRAQ-113 labeled amino acids were  
165 used as the isotopic ISs for the normalization of their corresponding iTRAQ-121 labeled amino  
166 acids in biological samples. The obtained quantitative data of amino acid were further used for  
167 statistical analysis. SIMICA-P+ 13.0 (Umetrics AB, Umeå Sweden) was employed for the  
168 principal component analysis (PCA) analysis. The changes of amino acid levels affected by  
169 various environmental factors were identified by using t-test ( $p < 0.05$ ).

## 170 **Results and Discussion**

### 171 **Quantification of amino acids and related amines by iTRAQ-based profiling**

172 A novel approach had been developed for the comprehensive profiling and quantification of  
173 amino acids and related amines based on iTRAQ<sup>®</sup>-LC-MS/MS in our previous study [26].  
174 Norvaline was added to the reaction system to investigate the derivatization efficiency. Results  
175 showed more than 80% norvaline could be derivatized by the iTRAQ reagent. Thirty-one labeled  
176 amino acids and related compounds were separated and quantified with excellent peak shapes in  
177 current study. The MRM ion chromatograms corresponding to amino acids and their isotopic  
178 internal standards were extracted from the data obtained by LC-MS/MS. Integration and  
179 calculation were adjusted to quantify amino acid levels to explore the effects of pre-processing  
180 temperature and freeze-thawing cycles upon the stability of amino acids and related amines in  
181 serum samples. Principal component analysis (PCA) could provide the information of clustering  
182 in each group and the possible changes of the metabolic profiles. The concentration was assigned

183 as variable while the pre-storage handling conditions and freeze-thaw cycles were set as factors in  
184 the multivariate data of quantification results of 31 amino acids. SIMCA-P 13.0 (Version AB,  
185 Umeå, Sweden) were employed to visually investigate the clustering of amino acids detectable in  
186 serum at different pre-processing and conditions. Fig.3 showed the three-dimensional PCA score  
187 plot of serum samples placed at 4 °C and 22 °C with different dosage duration as well as samples  
188 detected immediately after processing process. This multivariate analysis showed relative values  
189 of R2X (cum) = 0.385 and Q2 (cum) = 0.203. The samples placed at 4 °C and 22 °C were  
190 clustered obviously and the samples stored at 22 °C were relatively scattered and more deviation  
191 were found in samples immediately analyzed after processing. Fig.4 showed the three-dimensional  
192 PCA score plot of serum samples for different dosage duration (0, 1, 2, 4, 8, 12 and 24 hours) at  
193 4 °C (A) and 22 °C (B) respectively. The values for the two multivariate analysis were R2X (cum)  
194 = 0.427, Q2 (cum) = 0.185 and R2X (cum) = 0.442, Q2 (cum) = 0.213, respectively. Moreover,  
195 amino acids had been changed in a time-dependent manner at different pre-processing temperature.  
196 The serum samples at 4 °C from 0 to 24 hours scattered and distributed with prolonged storage  
197 time, gathered at the same pre-storage times but gradually deviated from immediately detected  
198 samples. While placed at the room temperature, the serum samples scattered and distributed  
199 relying on the time extension, however they deviated from the sample group with rapid detection  
200 significantly during 8 to 24 hours. Taken together, the results showed that temperature and sample  
201 store time had a greater impact on the composition of amino acids in serum.

#### 202 **Stability of serum amino acids at 4 °C**

203 17 amino acids in serum were significantly altered at 4 °C with different pre-processing periods  
204 ( $p < 0.05$ ) (Fig.5). The content and change rates of these amino acids were altered significantly  
205 after serum specimens incubated at 4 °C for 24 hours. (Table S1). Histidine, leucine,  
206 phenylalanine, tryptophan, valine, glycine, aspartate, glutamate,  $\beta$ -alanine and 3-methylhistidine  
207 increased significantly after 24 hours. Lysine and taurine were differentially regulated to  
208 significantly higher levels within 4 hours while serine, cystine and alanine decreased after 8 hours



209 and phosphoethanolamine as well as proline decreased after 24 hours. It should be noted that  
210 aspartate remained relatively stable within one hour, nonetheless the concentration increased  
211 rapidly after one hour to approximately seven hundred-fold changes. Glutamate also increased  
212 continuously after 8 hours with the change rate of 266 %.

### 213 **Stability of serum amino acids at 22 °C**

214 The levels of 18 amino acids markedly varied after 24 hours at room temperature after serum  
215 sample preprocessing ( $p<0.05$ ) (Fig.6). Histidine, isoleucine, leucine, lysine, methionine,  
216 phenylalanine, valine, aspartate, glycine, ornithine and 3-methylhistidine increased obviously after  
217 24 hours (Table S2). A reduction of cystine and phosphoethanolamine occurred after 24 hours of  
218 storage as threonine and tryptophan decreased within 12 hours. The levels of asparagine,  
219 glutamate and alanine were markedly elevated after 4 hours. Moreover, approximately three  
220 hundred-fold changes of the aspartate occurred rapidly within one hour and became concentrated  
221 steadily thereafter. The change rate of aspartate had reached almost 634% until 24 hours.  
222 Glutamate continuously increased significantly after two hours of preprocessing and the change  
223 rate was about 462 %. Cystine and phosphoethanolamine decreased about 16% to 47% compared  
224 with their initial concentration after 24 hours of storage.

### 225 **Stability of serum amino acids after three freeze-thaw cycles at -80 °C**

226 After the serum samples were frozen and thawed three times at -80 °C, the concentrations of 11  
227 amino acids (histidine, leucine, isoleucine, methionine, phenylalanine, glutamate, tryptophan,  
228 valine, taurine, tyrosine and ornithine) in the serum increased obviously compared with the  
229 samples without freeze-thaw treatment ( $p<0.05$ ). Four amino acids including cystine,  $\beta$ -alanine, 1-  
230 methylhistidine and aspartate reduced in concentration after the freeze-thaw cycle ( $p<0.05$ ) (Fig.7).  
231 The increased rate of change for these amino acids varied from 31.45 % to 252.12 % while that of  
232 the reduced rate was 42.57 % to 100.00 % (Table S3).

### 233 **Marked concentration changes in amino acids due to pre-storage handling**

234 Our experiment with different pre-storage handling conditions showed pronounced changes of the

235 detectable amino acids and related amines. Approximately 54.84 %, 58.06 % and 48.39 % of  
236 target analytes altered at 4 °C and 22 °C and freeze-thaw cycles during preprocessing. Seven  
237 amino acids, regarding to histidine, leucine, phenylalanine, tryptophan, valine, aspartate and  
238 cystine, were more sensitive with evident modifications by multiple factors including different  
239 storage time and temperature as well as repeated freeze-thaw cycles. On the contrary, arginine,  
240 tyrosine, citrulline,  $\alpha$ -amino-N-butyric acid,  $\beta$ -aminoisobutyric acid, ethanolamine and  
241 hydroxyproline were more stable and remained unchanged under any conditions. Except tyrosine,  
242 all branched chain amino acids and aromatic amino acids were sensitive to storage temperature  
243 and freeze-thaw. It was noteworthy that the augmented levels of aspartate and glutamate were  
244 observed during 4 °C and 22 °C for extended storage periods in our study. This possibly results  
245 from that asparagine and glutamine were converted to their dicarboxylic acid counterparts by  
246 deamidation [27]. Protein degradation process is the key factor for the increase of amino acids,  
247 especially for those amino acids occurring with high frequency in proteins e.g. isoleucine and  
248 glycine. Tryptophan and phenylalanine increased distinctly after repeated freeze-thaw cycles  
249 given the protein degradation during thawing and refreezing. This assumption was supported by  
250 the fact in previous study [19, 28]. Increased cystine could be explained by rapid oxidation from  
251 instable cysteine to cystine at room temperature. However, since level of cystine was also lowered  
252 during repeated freeze-thaw cycles, the reduction of both cysteine and cystine could be a result of  
253 oxidative conversion to unidentified derivatives as described previously [29]. Up to four freeze-thaw  
254 cycles will not affect the stability of the metabolites which was inferred by other researchers [19].  
255 Conversely, our results indicated the freeze-thaw had a great effect on the stability of the amino  
256 acids in biological samples.

## 257 **Conclusions**

258 The stability of amino acids in serum samples which underwent prolonged exposure at 4 °C and  
259 20 °C and repeated freeze-thaw cycles at -80 °C were investigated by using stable isotope iTRAQ  
260 labeling and liquid chromatography tandem mass spectrometry. The results indicated that

261 pronounced changes of amino acids had occurred during different preprocessing and the pre-  
262 storage conditions separately. Temperature, storage time and freeze-thaw cycle imposed critical  
263 effects on the stability of amino acids. In that case, the precise control over the collection,  
264 preservation and pretreatment of serum samples should be optimized and standardized in certain  
265 aspects, for example, biological samples should avoid freeze-thaw before detection. Meanwhile,  
266 the process of pretreatment should be operating at 4 °C to improve the reliability of potential  
267 biomarkers and metabolites. The current study provided a standard method for the collection,  
268 preparation, transportation and storage of serum samples through the quantitative analysis of  
269 amino acids and metabonomics based on liquid chromatography-mass spectrometry.

### 270 **Financial Support**

271 This study was supported by grants (81100283 and 81341015) from the National Natural Science  
272 Foundation of China, a project (7142065) from the Beijing Municipal Natural Science Foundation,  
273 Beijing Municipal Administration of Hospitals' Youth Programme (QML20150305) and 1351  
274 Talents Program of the Beijing Chao-Yang Hospital (CYXX-2017-31).

### 275 **Conflict of interest**

276 The authors declare no conflicts of interest.

### 277 **References**

- 278 1. Phipps WS, Jones PM, Patel K. Amino and organic acid analysis: Essential tools in the  
279 diagnosis of inborn errors of metabolism. *Adv Clin Chem.* 2019, 92:59-103.
- 280 2. de Koning TJ. Amino acid synthesis deficiencies. *J Inherit Metab Dis.* 2017, 40(4):609-620.
- 281 3. Poggiogalle E, Fontana M, Giusti AM, Pinto A, Iannucci G, Lenzi A, Donini LM. Amino Acids  
282 and Hypertension in Adults. *Nutrients.* 2019, 11(7). pii: E1459.
- 283 4. Nie C, He T, Zhang W, Zhang G, Ma X. Branched Chain Amino Acids: Beyond Nutrition  
284 Metabolism. *Int J Mol Sci.* 2018, 19(4). pii: E954.
- 285 5. Larsson SC, Håkansson N, Wolk A. Dietary cysteine and other amino acids and stroke  
286 incidence in women. *Stroke.* 2015, 46(4):922-926.

- 287 6. Yoon MS. The Emerging Role of Branched-Chain Amino Acids in Insulin Resistance and  
288 Metabolism. *Nutrients*. 2016, 8(7). pii: E405.
- 289 7. Gar C, Rottenkolber M, Prehn C, Adamski J, Seissler J, Lechner A. Serum and plasma amino  
290 acids as markers of prediabetes, insulin resistance, and incident diabetes. *Crit Rev Clin Lab Sci*.  
291 2018, 55(1):21-32.
- 292 8. Xia T, Fu S, Wang Q, Wen Y, Chan SA, Zhu S, Gao S, Tao X, Zhang F, Chen W. Targeted  
293 metabolomic analysis of 33 amino acids and biogenic amines in human urine by ion-pairing  
294 HPLC-MS/MS: Biomarkers for tacrolimus nephrotoxicity after renal transplantation. *Biomed*  
295 *Chromatogr*. 2018, 32(7):e4198.
- 296 9. Korenaga M, Nishina S, Korenaga K, Tomiyama Y, Yoshioka N, Hara Y, Sasaki Y, Shimonaka  
297 Y, Hino K. Branched-chain amino acids reduce hepatic iron accumulation and oxidative stress in  
298 hepatitis C virus polyprotein-expressing mice. *Liver Int*. 2015, 35(4):1303-1314.
- 299 10. Li Z, Zhang H. Reprogramming of glucose, fatty acid and amino acid metabolism for cancer  
300 progression. *Cell Mol Life Sci*. 2016, 73(2):377-392.
- 301 11. Yang M, Vousden KH. Serine and one-carbon metabolism in cancer. *Nat Rev Cancer*. 2016,  
302 16(10):650-662.
- 303 12. Haid M, Muschet C, Wahl S, Römisch-Margl W, Prehn C, Möller G, Adamski J. Long-Term  
304 Stability of Human Plasma Metabolites during Storage at  $-80^{\circ}\text{C}$ . *J Proteome Res*. 2018,  
305 17(1):203-211.
- 306 13. Pinto J, Domingues MR, Galhano E, Pita C, Almeida Mdo C, Carreira IM, Gil AM. Human  
307 plasma stability during handling and storage: impact on NMR metabolomics. *Analyst* 2014,  
308 139(5):1168-1177.
- 309 14. Manuela T, Marianne DK, Nicholas NJ. NMR-based metabonomics of bovine blood: an  
310 investigation into the effects of long term storage on plasma samples. *Metabolomics*, 2013,  
311 9(5):1041-1047.
- 312 15. Wagner-Golbs A, Neuber S, Kamlage B, Christiansen N, Bethan B, Rennefahrt U, Schatz P,

- 313 Lind L. Effects of Long-Term Storage at -80 °C on the Human Plasma Metabolome. *Metabolites*.  
314 2019, 9(5). pii: E99
- 315 16. Hustad S, Eussen S, Midttun Ø, Ulvik A, van de Kant PM, Mørkrid L, Gislefoss R, Ueland  
316 PM. Kinetic modeling of storage effects on biomarkers related to B vitamin status and one-carbon  
317 metabolism. *Clin. Chem.* 2012, 58(2):402-410.
- 318 17. Joyce R, Kuziene V, Zou X, Wang X, Pullen F, Loo RL. Development and validation of an  
319 ultra-performance liquid chromatography quadrupole time of flight mass spectrometry method for  
320 rapid quantification of free amino acids in human urine. *Amino Acids*. 2016, 48(1):219-234.
- 321 18. La Frano MR, Carmichael SL, Ma C, Hardley M, Shen T, Wong R, Rosales L, Borkowski K,  
322 Pedersen TL, Shaw GM, Stevenson DK, Fiehn O, Newman JW. Impact of post-collection freezing  
323 delay on the reliability of serum metabolomics in samples reflecting the California mid-term  
324 pregnancy biobank. *Metabolomics*. 2018, 14(11):151.
- 325 19. Anton G, Wilson R, Yu ZH, Prehn C, Zukunft S, Adamski J, Heier M, Meisinger C, Römisch-  
326 Margl W, Wang-Sattler R, Hveem K, Wolfenbuttel B, Peters A, Kastenmüller G, Waldenberger M.  
327 Pre-analytical sample quality: metabolite ratios as an intrinsic marker for prolonged room  
328 temperature exposure of serum samples. *PLoS One*. 2015, 10(3):e0121495.
- 329 20. Kamlage B, Maldonado SG, Bethan B, Peter E, Schmitz O, Liebenberg V, Schatz P. Quality  
330 markers addressing preanalytical variations of blood and plasma processing identified by broad  
331 and targeted metabolite profiling. *Clin Chem*. 2014, 60(2):399-412.
- 332 21. Breier M, Wahl S, Prehn C, Fugmann M, Ferrari U, Weise M, Banning F, Seissler J, Grallert  
333 H, Adamski J, Lechner A. Targeted metabolomics identifies reliable and stable metabolites in  
334 human serum and plasma samples. *PLoS One*. 2014, 9(2):e89728.
- 335 22. Yang W, Chen Y, Xi C, Zhang R, Song Y, Zhan Q, Bi X, Abliz Z. Liquid chromatography-  
336 tandem mass spectrometry-based plasma metabolomics delineate the effect of metabolites'  
337 stability on reliability of potential biomarkers. *Anal Chem*. 2013, 85(5):2606-2610.
- 338 23. Ang JE, Revell V, Mann A, Mantele S, Otway DT, Johnston JD, Thumser AE, Skene DJ,

339 Raynaud F. Identification of human plasma metabolites exhibiting time-of-day variation using an  
340 untargeted liquid chromatography-mass spectrometry metabolomic approach. *Chronobiol Int.*  
341 2012, 29(7):868-881

342 24. Pinto J, Domingues MR, Galhano E, Pita C, Almeida MD, Carreira IM, Gil AM. Human  
343 plasma stability during handling and storage: impact on NMR metabolomics. *Analyst.* 2014,  
344 139(5):1168-1177.

345 25. Fliniaux O, Gaillard G, Lion A, Cailleu D, Mesnard F, Betsou F (2011) Influence of common  
346 preanalytical variations on the metabolic profile of serum samples in biobanks. *J Biomol NMR.*  
347 2011, 51(4):457-465.

348 26. An Z, Hu T, Lv Y, Li P, Liu L. Targeted amino acid and related amines analysis based on  
349 iTRAQ®-LC-MS/MS for discovering potential hepatotoxicity biomarkers. *J Pharm Biomed Anal.*  
350 2020, 178:112812.

351 27. Wright HT. Nonenzymatic deamidation of asparaginyl and glutaminyl residues in proteins.  
352 *Crit Rev Biochem Mol Biol.* 1991, 26(1):1-52.

353 28. Wood JT, Williams JS, Pandarinathan L, Courville A, Keplinger MR, Janero DR, Vouros P,  
354 Makriyannis A, Lammi-Keefe CJ. Comprehensive profiling of the human circulating  
355 endocannabinoid metabolome: clinical sampling and sample storage parameters. *Clin Chem Lab*  
356 *Med.* 2008, 46(9):1289-1295.

357 29. Moriya T, Satomi Y, Kobayashi H. Intensive determination of storage condition effects on  
358 human plasma metabolomics. *Metabolomics.* 2016, 12(12):179.

359

360

361

362

363

364

365 **Figures**

366

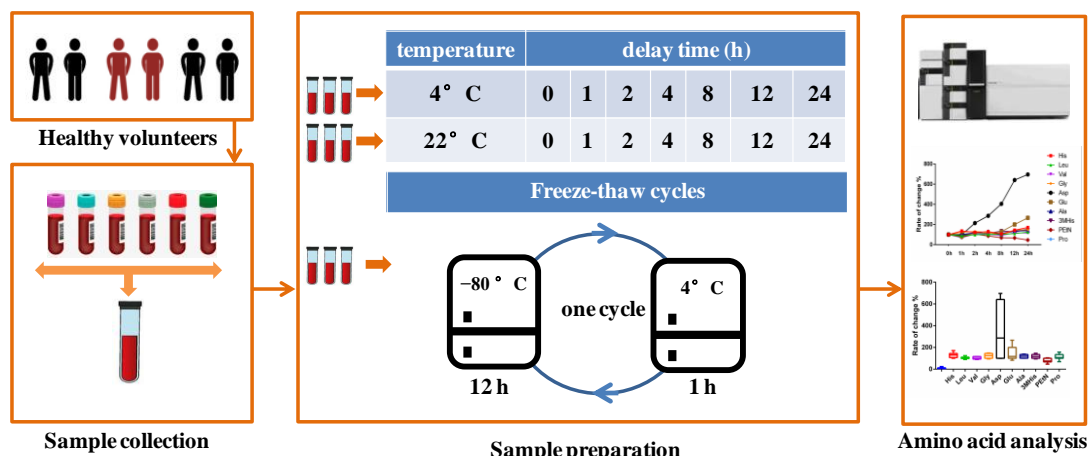

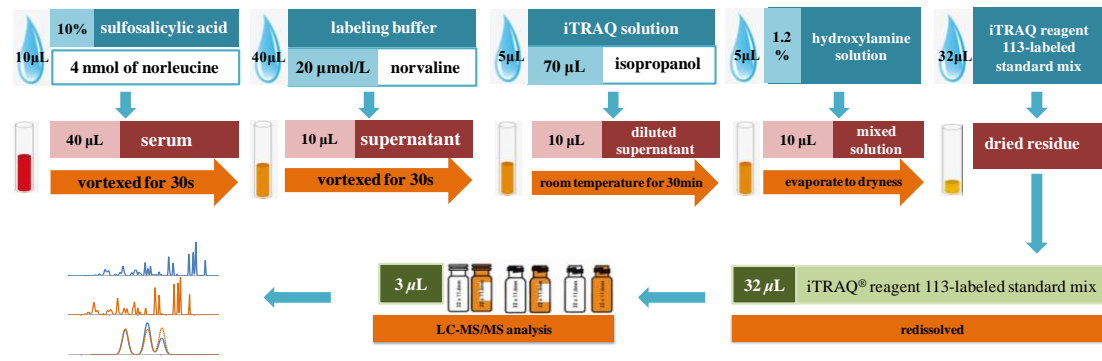

386 **Fig. 2** A workflow indicating the procedures for biological sample preparation and amino acid  
387 derivatization using ITRAQ reagents.

388

389

390

391

392

393

394

395

396

397

398

399



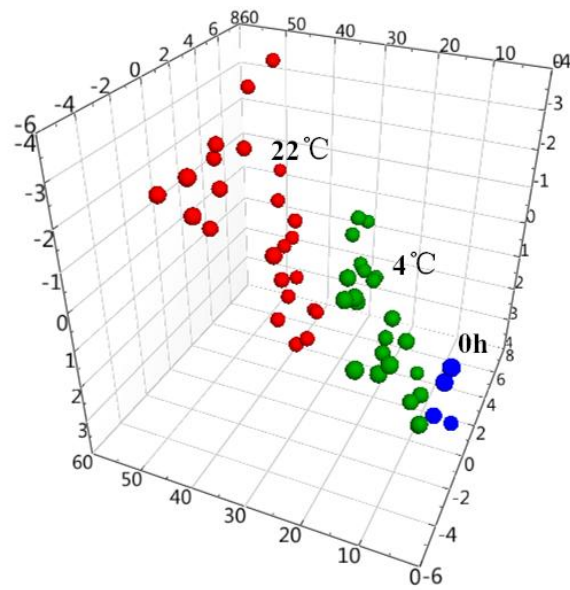

R2X (cum)=0.385 and Q2 (cum)=0.203

400

401 **Fig. 3** PCA score plot of the concentration of amino acids in human serum deposited at 4 °C (●),

402 22 °C (●) and samples detected immediately after processing process (●).

403

404

405

406

407

408

409

410

411

412

413

414

415

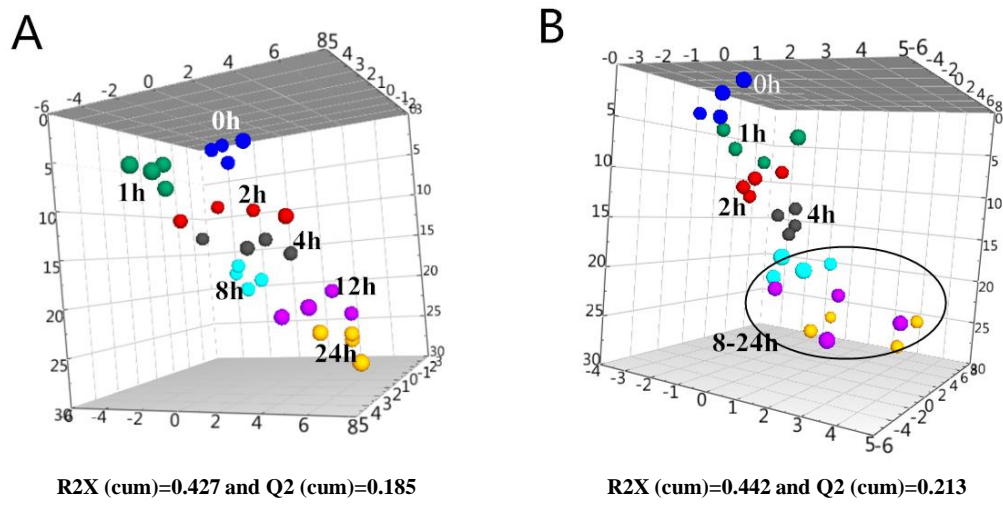

416

417 **Fig. 4** PCA score plot of the serum samples deposited at 4 °C (A) and 22 °C (B) from 0 h to 24 h

418 (●: 0 hour, ●: 1 hour, ●: 2 hours, ●: 4 hours, ●: 8 hours, ●: 12 hours, ●: 24 hours).

419

420

421

422

423

424

425

426

427

428

429

430

431

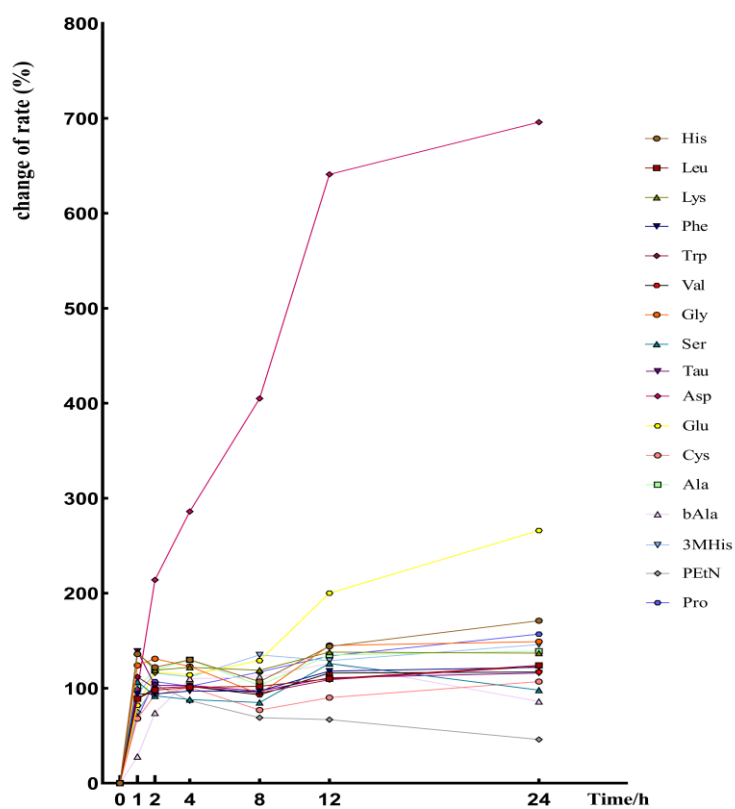

432  
433 **Fig.5** The change rate of 17 amino acids in serum after serum specimens incubated at 4 °C for 24  
434 hours ( $p<0.05$ ).

435  
436  
437  
438  
439  
440  
441  
442

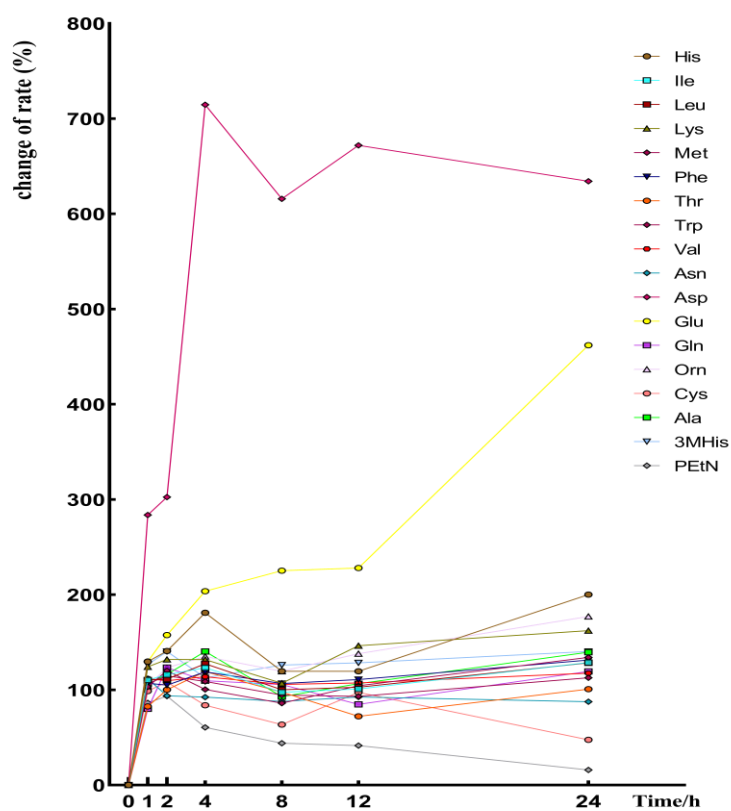

443

444 **Fig. 6** The change rate of 18 amino acids in serum after serum specimens incubated at 22 °C for

445 24 hours ( $p < 0.05$ ).

446

447

448

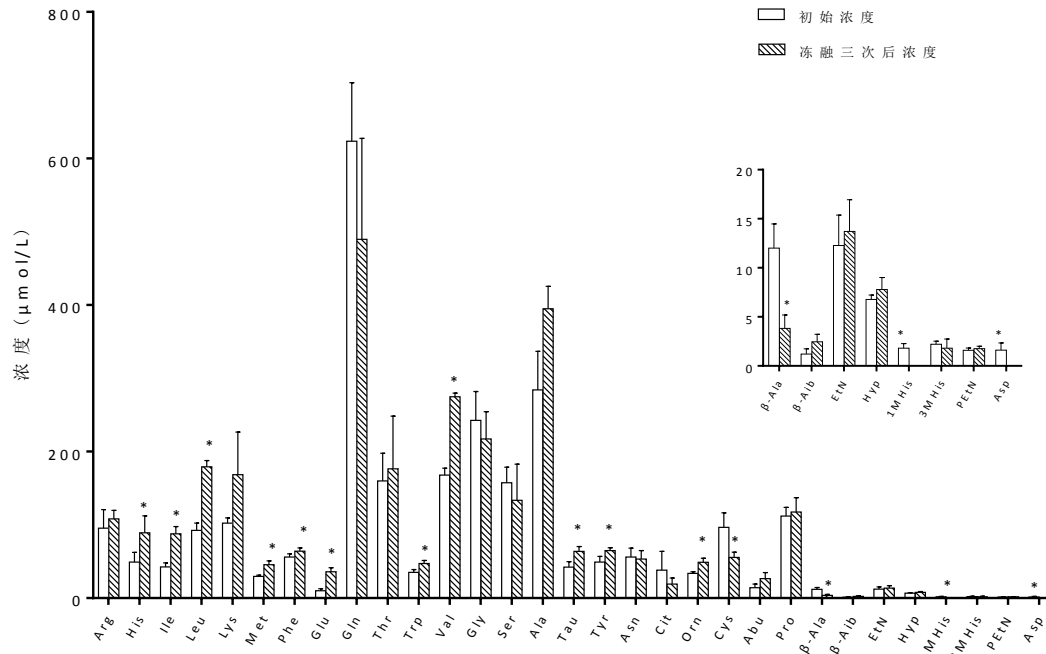

449

450 **Fig. 7** The changes of amino acids in serum after three freeze-thaw cycles and the concentrations  
451 of 14 amino acids in the serum altered obviously compared with the samples without freeze-thaw  
452 process ( $p < 0.05$ ). The freeze-thaw cycle including samples were brought from  $-80\text{ }^{\circ}\text{C}$ , placed at  
453  $4\text{ }^{\circ}\text{C}$  for one hour and delivered to  $-80\text{ }^{\circ}\text{C}$  for 12 hours.

1 **Stability of amino acids and related amines in human serum under different**  
2 **preprocessing and pre-storage conditions based on iTRAQ<sup>®</sup>-LC-MS/MS**

3 Zhuoling An\*, Chen Shi, Pengfei Li, Lihong Liu\*

4

5 *Pharmacy Department of Beijing Chao-Yang Hospital, Capital Medical University, Beijing,*  
6 *100020, PR China*

7 **\* Corresponding author**

8 Zhuoling An

9 No. 8 Gongren Tiyuchang Nanlu, Chaoyang District, Beijing, 100020, P. R. China

10 Tel: (+86) 01085231362.

11 Fax: (+86) 01085231362.

12 E-mail:anzhuoling@163.com

13

14 Lihong Liu, Professor of Medicine

15 No. 8 Gongren Tiyuchang Nanlu, Chaoyang District, Beijing, 100020, P. R. China

16 Tel: (+86) 01085231788.

17 Fax: (+86) 01085231788.

18 E-mail: liulihong@bjcyh.com

19

20

21

22

23

24

25

26 **Figures**

27

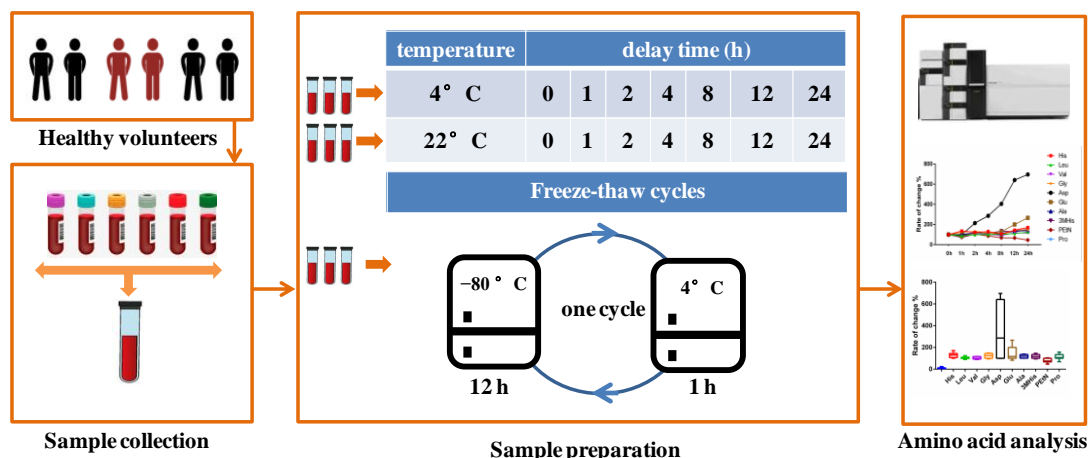

28

29 **Fig. 1** Scheme of stability investigation of amino acids and related amines in human serum under  
 30 three preprocessing and pre-storage. (1) the serum specimens placed at 4 °C for 0, 1, 2, 4, 8, 12  
 31 and 24 hours; (2) samples were placed at 22 °C for 0, 1, 2, 4, 8, 12 and 24 hours; (3) serum  
 32 aliquots were stored at -80 °C and subjected to up to three freeze-thaw cycles. A freeze-thaw cycle  
 33 consisted of taking out from -80 °C, thawing aliquots for one hour at 4 °C, setting them back to  
 34 -80 °C for 12 hours.

35

36

37

38

39

40

41

42

43

44

45



46

47 **Fig. 2** A workflow indicating the procedures for biological sample preparation and amino acid

48 derivatization using ITRAQ reagents.

49

50

51

52

53

54

55

56

57

58

59

60



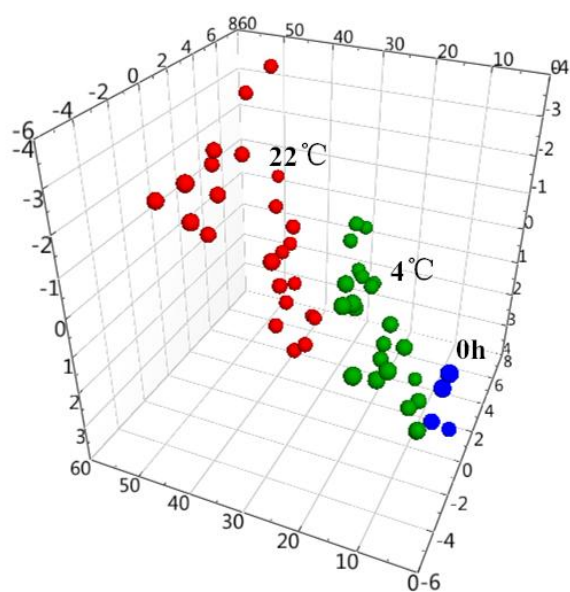

R2X (cum)=0.385 and Q2 (cum)=0.203

61

62 **Fig. 3** PCA score plot of the concentration of amino acids in human serum deposited at 4 °C (●),

63 22 °C (●) and samples detected immediately after processing process (●).

64

65

66

67

68

69

70

71

72

73

74

75

76

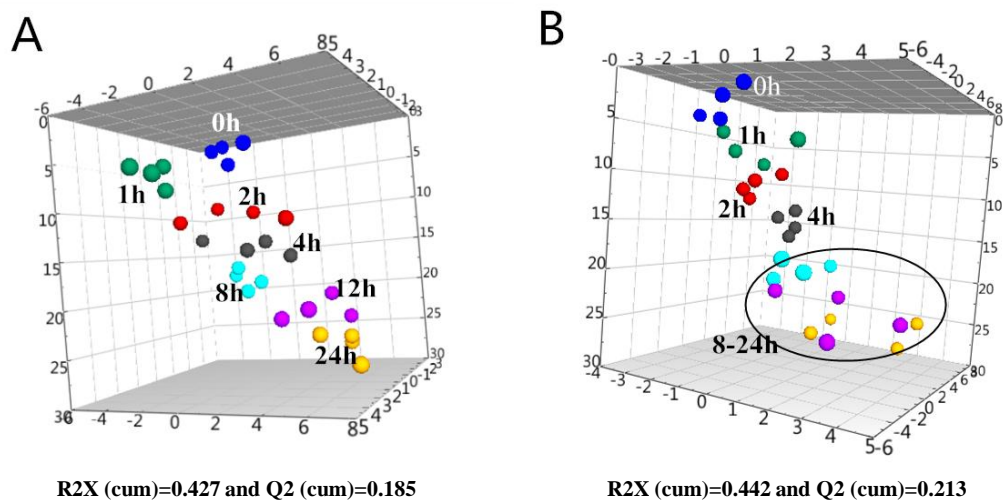

77

78 **Fig. 4** PCA score plot of the serum samples deposited at 4 °C (A) and 22 °C (B) from 0 h to 24 h

79 (●: 0 hour, ●: 1 hour, ●: 2 hours, ●: 4 hours, ●: 8 hours, ●: 12 hours, ●: 24 hours).

80

81

82

83

84

85

86

87

88

89

90

91

92

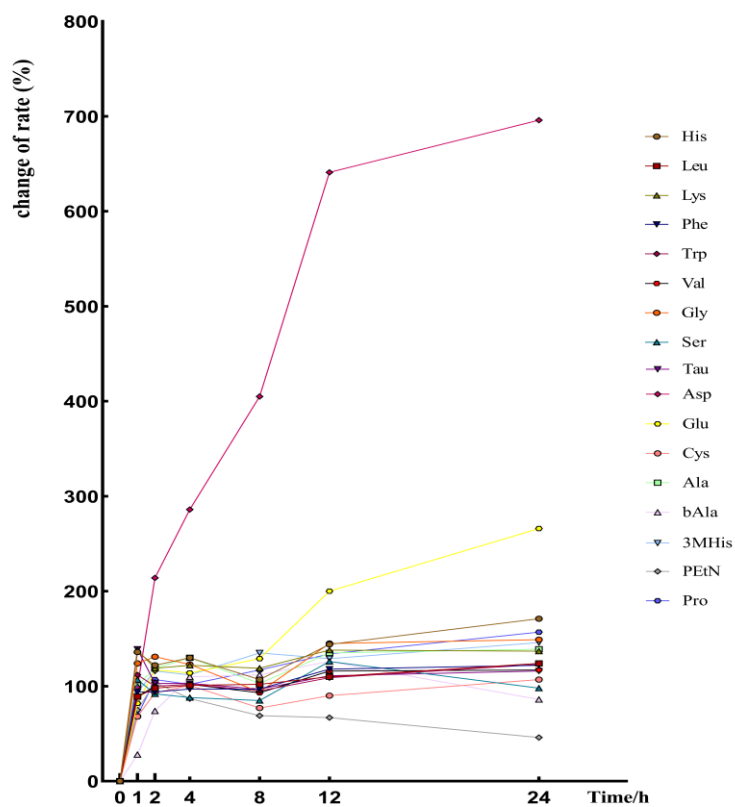

93  
94 **Fig.5** The change rate of 17 amino acids in serum after serum specimens incubated at 4 °C for 24  
95 hours ( $p<0.05$ ).

96

97

98

99

100

101

102

103

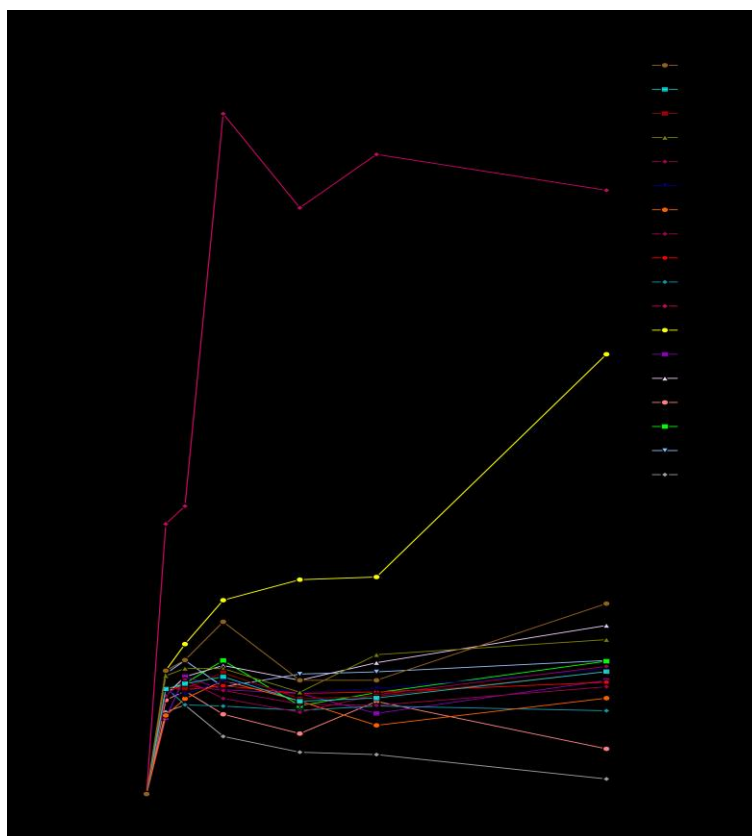

104

105 **Fig. 6** The change rate of 18 amino acids in serum after serum specimens incubated at 22 °C for  
106 24 hours ( $p<0.05$ ).

107

108

109



110

111 **Fig. 7** The changes of amino acids in serum after three freeze-thaw cycles and the concentrations  
112 of 14 amino acids in the serum altered obviously compared with the samples without freeze-thaw  
113 process ( $p < 0.05$ ). The freeze-thaw cycle including samples were brought from  $-80\text{ }^{\circ}\text{C}$ , placed at  
114  $4\text{ }^{\circ}\text{C}$  for one hour and delivered to  $-80\text{ }^{\circ}\text{C}$  for 12 hours.
